# Supplementary material
Source: PubMed Central journal article supplement (PMC3758819)
Supplement: 13280_2013_412_MOESM1_ESM.pdf [file 13280_2013_412_MOESM1_ESM.pdf]

## Electronic Supplementary Material

Article site, corresponding UNEP station ID and coordinates

| <b>LGA</b> | <b>Site</b> | <b>Station ID</b> | <b>Location</b>          | <b>Closest community</b> | <b>Eastin g</b> | <b>Northin g</b> |
|------------|-------------|-------------------|--------------------------|--------------------------|-----------------|------------------|
| Eleme      | E01         | 101-002           | Aleto river              | Aleto                    | 290007          | 531822           |
| Eleme      | E02         | 101-001           | Okulu/Agbonchia          | Agbonchia                | 291981          | 531879           |
| Eleme      | E03         | 001-001           | Ejama pond               | Ejama                    | 294650          | 527823           |
| Eleme      | E04         | 107-001           | Eyaa river               | Eyaa                     | 296806          | 524266           |
| Eleme      | E05         | 108-001           | Onura/lkpokiri           | Onne                     | 297948          | 519439           |
| Gokan<br>a | G01         | 123-001           | Barabedo                 | K Dere                   | 308925          | 514931           |
| Gokan<br>a | G02         | 120-004           | Miigu creek              | Bodo city                | 305181          | 512677           |
| Gokan<br>a | G03         | 120-001           | Bodo jetty               | Bodo city                | 306097          | 511770           |
| Gokan<br>a | G04         | 130-001           | Numubia/Kolgba           | Kolgba                   | 307109          | 511276           |
| Gokan<br>a | G05         | 121-001           | Bara-gwara river         | Sugi                     | 307121          | 509516           |
| Gokan<br>a | G06         | 118-001           | Kozo creek               | Bodo city                | 308643          | 508722           |
| Gokan<br>a | G07         | 119-001           | Bodo west, well 4        | Bodo West                | 303003          | 509691           |
| Gokan<br>a | G08         | 119-002           | Bodo West Creek          | Bodo West                | 302860          | 508994           |
| Gokan<br>a | G09         | 120-002           | Benobara/Seeato<br>creek | Bodo city                | 304850          | 505926           |
| Gokan<br>a | G10         | 104-004           | Seeato                   | Ataba                    | 306969          | 503617           |
| Gokan<br>a | G11         | 104-003           | Otikoroma                | Ataba                    | 312408          | 504411           |

|       |     |         |                     |                           |        |        |
|-------|-----|---------|---------------------|---------------------------|--------|--------|
| Khana | K01 | 117-001 | Luegbo-beeri stream | Luegbo Beeri              | 329294 | 518405 |
| Khana | K02 | 106-001 | Lubara creek        | Lubara                    | 328482 | 516077 |
| Khana | K03 | 106-002 | Luutem creek        | Luutem-Duburo             | 331926 | 514453 |
| Khana | K04 | 106-003 | Lubara creek        | Luumene-Duburo            | 330705 | 514635 |
| Khana | K05 | 106-004 | Lubara creek        | Bane                      | 334163 | 514489 |
| Khana | K06 | 105-001 | Imo River site 1    | Kalaoko North             | 337337 | 519155 |
| Khana | K07 | 105-002 | Imo River site 2    | Lubara creek mouth        | 336358 | 515399 |
| Khana | K08 | 105-003 | Imo River site 3    | Ikot Abasi -Kono Boundary | 338077 | 507067 |
| Khana | K09 | 105-004 | Imo River site 4    | Kono Creek                | 335870 | 508346 |
| Khana | K10 | 116-001 | Makaakoo stream     | Kwawa                     | 331520 | 509216 |
| Khana | K11 | 112-001 | Busu                | Teera-ue                  | 329641 | 507573 |
| Khana | K12 | 111-001 | Teera-ue river      | Teera-ue                  | 330456 | 507572 |
| Khana | K13 | 113-001 | Iyon-oren river     | Teenema                   | 328277 | 505787 |
| Khana | K14 | 115-001 | Eeta river          | Luyor Gwara               | 322979 | 506555 |
| Khana | K15 | 104-002 | Andoni river        | Ataba                     | 315780 | 506016 |
| Tai   | T01 | 109-001 | Oorterba stream     | Kporghor                  | 303291 | 519465 |
| Tai   | T02 | 110-001 | Kporghor stream     | Kporghor                  | 304002 | 520198 |
| Tai   | T03 | 122-001 | Vuru-vuru river     | B dere                    | 306132 | 518671 |
| Tai   | T04 | 103-001 | Obemadem stream     | Korokoro                  | 311602 | 524537 |
| Tai   | T05 | 103-002 | Oohoro stream       | Korokoro                  | 311707 | 523667 |
| Tai   | T06 | 103-003 | Oogbor              | Korokoro-Kpite            | 311940 | 523029 |
